# Supplementary material
Source: ML conference proceedings conference paper supplement (https://openreview.net/forum?id=0ez68a5UqI)
Supplement: supplementary_material [file attachment]

## A TSP-AS-MILP FORMULATION

In general, due to the fact that TSP is amongst the most studied problems in discrete optimization, we can expect existing mixed-integer programming systems to have rich heuristics that provide a strong baseline for our method. Mathematically, we choose the Miller–Tucker–Zemlin (MTZ) formulation (Miller et al., 1960):

$$\min_x \quad \sum_{i=1}^n \sum_{j \neq i, j=1}^n c_{ij} x_{ij} \quad (14a)$$

$$\text{subject to} \quad \sum_{j=1, i \neq j}^n x_{ij} = 1 \quad \forall i = 1, \dots, n \quad (14b)$$

$$\sum_{i=1, i \neq j}^n x_{ij} = 1 \quad \forall j = 1, \dots, n \quad (14c)$$

$$u_1 - u_j + (n-1)x_{ij} \leq n-2 \quad 2 \leq i \neq j \leq n \quad (14d)$$

$$2 \leq u_i \leq n \quad 2 \leq i \leq n \quad (14e)$$

$$u_i \in \mathbb{Z}, x_{ij} \in \{0, 1\} \quad (14f)$$

Effectively this formulation keeps two buffers: one being the actual  $(i, j)$ -edges travelled  $x_{ij}$ , the other being a node-order variable  $u_i$  that makes sure that  $u_i < u_j$  if  $i$  is visited before  $j$ . There are alternative formulations, such as the Dantzig–Fulkerson–Johnson (DFJ) formulation, which are used in modern purpose-built TSP solvers, but those are less useful for general problem generation: The MTZ formulation essentially relaxes the edge-assignments and order constraints, which then are branch-and-bounded into hard assignments during the solving process. This is different to DFJ, which instead relaxes the “has to pass through all nodes” constraint. DFJ allows for subtours (e. g., only contain node  $A, B, C$  but not  $D, E$ ) which then get slowly eliminated via the on-the-fly generation of additional constraints. To generate these constraints one needs specialised row-generators which, while very powerful from an optimization point-of-view, make the algorithm less general as a custom row-generator has to intervene into every single node. However, in our usecase we also do not really care about the ultimate performance of individual algorithms as the reinforcement learner only looks for improvements to the existing node selections. This means that as long as the degree of improvement can be adequately judged, we do not need state-of-the-art solver implementations to give the learner a meaningful improvement signal.

## B UNCAPACITATED FACILITY LOCATION PROBLEM

Mathematically, the uncapacitated facility location problem can be seen as sending a product  $z_{ij}$  from facility  $i$  to consumer  $j$  with cost  $c_{ij}$  and demand  $d_j$ . One can only send from  $i$  to  $j$  if facility  $i$  is built in the first place, which incurs cost  $f_i$ . The overall problem therefore is

$$\min_x \quad \sum_{i=1}^n \sum_{j=1}^m c_{ij} d_j z_{ij} + \sum_{i=0}^n f_i x_i \quad (15a)$$

$$\text{subject to} \quad \sum_{j=1, i \neq j}^n z_{ij} = 1 \quad \forall i = 1, \dots, m \quad (15b)$$

$$\sum_{i=1, i \neq j}^n z_{ij} \leq M x_i \quad \forall j = 1, \dots, n \quad (15c)$$

$$z_{ij} \in \{0, 1\} \quad \forall i = 1, \dots, n, \forall j = 1, \dots, m \quad (15d)$$

$$x_i \in \{0, 1\} \quad \forall i = 1, \dots, n \quad (15e)$$

$$(15f)$$

where  $M$  is a suitably large constant representing the infinite-capacity one has when constructing  $x_i = 1$ . One can always choose  $M \geq m$  since that, for the purposes of the polytop is equivalent to setting  $M$  to literal infinity. This is also sometimes referred to as the “big  $M$ ” method.

The instance generator by Kochetov & Ivanenko (2005) works by setting  $n = m = 100$  and setting all opening costs at 3000. Every city has 10 “cheap” connections sampled from  $\{0, 1, 2, 3, 4\}$  and the rest have cost 3000, which represents infinity (i. e., also invoking the big  $M$  method).

## C FEATURES

Table 2 lists the features used on every individual node. The features split into two different types: One being “model” features, the other being “node” features. Model features describe the state of the entire model at the currently explored node, while node features are specific to the yet-to-be-solved added node. We aim to normalize all features with respect to problem size, as e. g., just giving the lower-bound to a problem is prone to numerical domain shifts. For instance a problem with objective  $c^T x, x \in P$  is inherently the same from a solver point-of-view as a problem  $10c^T x, x \in P$ , but would give different lower-bounds. Since NNs are generally nonlinear estimators, we need to make sure such changes do not induce huge distribution shifts. We also clamp the feature values between  $[-10, 10]$  which represent “infinite” values, which can occur, for example in the optimality gap. Last but not least, we standardize features using empirical mean and standard deviation. These features

Table 2: Features used per individual node.

|                |                                           |                                            |
|----------------|-------------------------------------------|--------------------------------------------|
| model features | Number of cuts applied                    | normalized by total number of constraints  |
|                | Number of separation rounds               |                                            |
|                | optimality gap                            |                                            |
|                | lp iterations                             |                                            |
|                | mean integrality gap                      |                                            |
|                | percentage of variables already integral  |                                            |
| node features  | histogram of fractional part of variables | 10 evenly sized buckets                    |
|                | depth of node                             | normalized by total number of nodes        |
|                | node lowerbound                           | normalized by min of primal and dual bound |
|                | node estimate                             | normalized by min of primal and dual bound |

are inspired by prior work, such as Labassi et al. (2022); Yilmaz & Yorke-Smith (2021), but adapted to the fact that we do not need e. g., explicit entries for the left or right child’s optimality gap, as these (and more general K-step versions of these) can be handled by the GNN.

Further, to make batching tractable, we aim to have constant size features. This is different from e. g., Labassi et al. (2022), who utilize flexibly sized graphs to represent each node. The upside of this approach is that certain connections between variables and constraints may become more apparent, with the downside being the increased complexity of batching these structures and large amounts of nodes used. This isn’t a problem for them, as they only consider pairwise comparisons between nodes, rather than the entire branch-and-bound graph, but for us would induce a great deal of complexity and computational overhead, especially in the larger instances. For this reason, we represent flexibly sized inputs, such as the values of variables, as histograms: i.e., instead of having  $k$  nodes for  $k$  variables and wiring them together, we produce once distribution of variable values with 10-buckets, and feed this into the network. This loses a bit of detail in the representation, but allows us to scale to much larger instances than ordinarily possible.

In general, these features are not optimized, and we would expect significant improvements from more well-tuned features. Extracting generally meaningful features from branch-and-bound is a nontrivial task and is left as a task for future work.

## D FULL RESULTS

The following two sections contain the per-instance results on the two “named” benchmarks TSPLIB (Reinelt, 1991) and MINLPLIB (Bussieck et al., 2003). We test against the strong SCIP 8.0.4 baseline. Due to compatibility issues, we decided not to test against (Labassi et al., 2022) or (He et al., 2014): These methods were trained against older versions of SCIP, which not only made running them challenging, but also would not give valid comparisons as we cannot properly account for changes between SCIP versions. Labassi et al. (2022) specifically relies on changes to the SCIP interface, which makes porting to SCIP 8.0.4 intractable. In general, this shouldn’t matter too much,

as SCIP is still demonstrably the state-of-the-art non-commercial mixed-integer solver, which frequently outperforms even closed-source commercial solvers (see Mittelmann (2021) for thorough benchmarks against other solvers), meaning outperforming SCIP can be seen as outperforming the state-of-the-art.

### D.1 TSPLIB RESULTS

Table 3: Results on TSPLIB (Reinelt, 1991) after 45s runtime. Note that we filter out problems in which less than 5 nodes were explored as those problems cannot gain meaningful advantages even with perfect node selection. “Name” refers to the instances name, “Gap Base/Ours” corresponds to the optimization gap achieved by the baseline and our method respectively (lower is better), “Nodes Base/Ours” to the number of explored Nodes by each method, and “Reward”, “Utility” and “Utility Node” to the different performance measures as described in Section 5.

| Name      | Gap Ours | Gap Base | Nodes Ours | Nodes Base | Reward       | Utility      | Utility/Node |
|-----------|----------|----------|------------|------------|--------------|--------------|--------------|
| att48     | 0.287    | 0.286    | 1086       | 2670       | -0.002       | -0.002       | 0.593        |
| bayg29    | 0.000    | 0.000    | 2317       | 7201       | 1.000        | 0.000        | 0.000        |
| bays29    | 0.000    | 0.036    | 11351      | 10150      | 1.000        | 1.000        | 0.997        |
| berlin52  | 0.000    | 0.000    | 777        | 1634       | 1.000        | 0.000        | 0.000        |
| bier127   | 2.795    | 2.777    | 23         | 25         | -0.007       | -0.007       | 0.074        |
| brazil58  | 0.328    | 0.644    | 1432       | 2182       | 0.491        | 0.491        | 0.666        |
| burma14   | 0.000    | 0.000    | 96         | 65         | 1.000        | 0.000        | 0.000        |
| ch130     | 8.801    | 8.783    | 48         | 43         | -0.002       | -0.002       | -0.106       |
| ch150     | 7.803    | 7.802    | 18         | 18         | -0.000       | -0.000       | -0.000       |
| d198      | 0.582    | 0.582    | 10         | 11         | -0.000       | -0.000       | 0.091        |
| dantzig42 | 0.185    | 0.100    | 2498       | 3469       | -0.847       | -0.459       | -0.248       |
| eil101    | 2.434    | 2.430    | 31         | 61         | -0.002       | -0.002       | 0.491        |
| eil51     | 0.178    | 0.017    | 828        | 4306       | -1.000       | -0.907       | -0.514       |
| eil76     | 0.432    | 1.099    | 309        | 709        | 0.607        | 0.607        | 0.829        |
| fri26     | 0.000    | 0.000    | 1470       | 6721       | 1.000        | 0.000        | 0.000        |
| gr120     | 7.078    | 7.083    | 41         | 43         | 0.001        | 0.001        | 0.047        |
| gr137     | 0.606    | 0.603    | 30         | 25         | -0.006       | -0.006       | -0.171       |
| gr17      | 0.000    | 0.000    | 92         | 123        | 1.000        | 0.000        | 0.000        |
| gr24      | 0.000    | 0.000    | 110        | 207        | 1.000        | 0.000        | 0.000        |
| gr48      | 0.192    | 0.340    | 586        | 2479       | 0.435        | 0.435        | 0.866        |
| gr96      | 0.569    | 0.552    | 93         | 182        | -0.032       | -0.031       | 0.472        |
| hk48      | 0.071    | 0.106    | 2571       | 2990       | 0.324        | 0.324        | 0.419        |
| kroA100   | 8.937    | 8.945    | 102        | 233        | 0.001        | 0.001        | 0.563        |
| kroA150   | 11.343   | 11.340   | 23         | 21         | -0.000       | -0.000       | -0.087       |
| kroA200   | 13.726   | 13.723   | 5          | 7          | -0.000       | -0.000       | 0.286        |
| kroB100   | 7.164    | 7.082    | 83         | 109        | -0.011       | -0.011       | 0.230        |
| kroB150   | 10.965   | 10.965   | 16         | 14         | 0.000        | 0.000        | -0.125       |
| kroB200   | 11.740   | 11.740   | 7          | 6          | 0.000        | 0.000        | -0.143       |
| kroC100   | 8.721    | 8.754    | 118        | 133        | 0.004        | 0.004        | 0.116        |
| kroD100   | 7.959    | 7.938    | 70         | 111        | -0.003       | -0.003       | 0.368        |
| kroE100   | 8.573    | 2.952    | 105        | 108        | -1.000       | -0.656       | -0.646       |
| lin105    | 2.005    | 2.003    | 98         | 149        | -0.001       | -0.001       | 0.341        |
| pr107     | 1.367    | 1.336    | 128        | 217        | -0.024       | -0.023       | 0.396        |
| pr124     | 0.937    | 0.935    | 64         | 61         | -0.001       | -0.001       | -0.048       |
| pr136     | 2.351    | 2.350    | 31         | 45         | -0.000       | -0.000       | 0.311        |
| pr144     | 2.228    | 2.200    | 47         | 37         | -0.012       | -0.012       | -0.222       |
| pr152     | 2.688    | 2.683    | 14         | 41         | -0.002       | -0.002       | 0.658        |
| pr226     | 1.091    | 1.092    | 6          | 6          | 0.001        | 0.001        | 0.001        |
| pr76      | 0.534    | 0.476    | 201        | 855        | -0.123       | -0.109       | 0.736        |
| rat99     | 0.853    | 0.849    | 41         | 80         | -0.005       | -0.005       | 0.485        |
| rd100     | 5.948    | 4.462    | 100        | 166        | -0.333       | -0.250       | 0.197        |
| si175     | 0.270    | 0.270    | 8          | 7          | 0.000        | 0.000        | -0.125       |
| st70      | 0.586    | 3.018    | 379        | 1068       | 0.806        | 0.806        | 0.931        |
| swiss42   | 0.000    | 0.000    | 1075       | 1133       | 1.000        | 0.000        | 0.000        |
| ulysses16 | 0.000    | 0.000    | 18322      | 19553      | 1.000        | 0.000        | 0.000        |
| ulysses22 | 0.103    | 0.127    | 13911      | 13313      | 0.191        | 0.191        | 0.154        |
| Mean      | NaN      | NaN      | 1321       | 1799       | <b>0.184</b> | <b>0.030</b> | <b>0.193</b> |

## D.2 MIPLIB RESULTS

Table 4: Results on MIPLIB (Gleixner et al., 2021) after 45s runtime. Note that we filter out problems in which less than 5 nodes were explored as those problems cannot gain meaningful advantages even with perfect node selection. “Name” refers to the instances name, “Gap Base/Ours” corresponds to the optimization gap achieved by the baseline and our method respectively (lower is better), “Nodes Base/Ours” to the number of explored Nodes by each method, and “Reward”, “Utility” and “Utility Node” to the different performance measures as described in Section 5. Note that all results were achieved with a policy only trained on TSP instances

| Name               | Gap Ours | Gap Base | Nodes Ours | Nodes Base | Reward | Utility | Utility/Node |
|--------------------|----------|----------|------------|------------|--------|---------|--------------|
| 30n20b8            | 2.662    | $\infty$ | 147        | 301        | 1.000  | 1.000   | 1.000        |
| 50v-10             | 0.101    | 0.113    | 303        | 1094       | 0.103  | 0.103   | 0.752        |
| CMS750_4           | 0.100    | 0.072    | 68         | 281        | -0.389 | -0.280  | 0.664        |
| air05              | 0.000    | 0.000    | 248        | 523        | 1.000  | 0.000   | 0.000        |
| assign1-5-8        | 0.085    | 0.087    | 17466      | 23589      | 0.030  | 0.030   | 0.282        |
| binkar10_1         | 0.000    | 0.000    | 2843       | 2270       | 1.000  | 0.000   | 0.000        |
| blp-ic98           | 0.127    | 0.127    | 26         | 43         | 0.001  | 0.001   | 0.396        |
| bnatt400           | $\infty$ | $\infty$ | 547        | 1568       | 0.000  | 0.000   | 0.651        |
| bnatt500           | $\infty$ | $\infty$ | 148        | 936        | 0.000  | 0.000   | 0.842        |
| bppe4-08           | 0.038    | 0.038    | 1318       | 3277       | 0.000  | 0.000   | 0.598        |
| cost266-UUE        | 0.130    | 0.143    | 468        | 770        | 0.094  | 0.094   | 0.449        |
| csched007          | $\infty$ | $\infty$ | 558        | 1770       | 0.000  | 0.000   | 0.685        |
| csched008          | 0.070    | $\infty$ | 910        | 1179       | 1.000  | 1.000   | 1.000        |
| cvs16r128-89       | 0.560    | 0.601    | 6          | 7          | 0.068  | 0.068   | 0.202        |
| drayage-25-23      | 0.000    | 0.000    | 105        | 267        | 1.000  | 0.000   | 0.000        |
| dws008-01          | $\infty$ | $\infty$ | 123        | 173        | 0.000  | 0.000   | 0.289        |
| eil33-2            | 0.194    | 0.189    | 191        | 171        | -0.025 | -0.024  | -0.127       |
| fast0507           | 0.027    | 0.027    | 11         | 7          | -0.003 | -0.003  | -0.366       |
| fastxgemm-n2r6s0t2 | 18.519   | 18.519   | 785        | 2531       | 0.000  | 0.000   | 0.690        |
| fhnw-binpack4-4    | $\infty$ | $\infty$ | 140002     | 152608     | 0.000  | 0.000   | 0.083        |
| fhnw-binpack4-48   | $\infty$ | 0.000    | 15019      | 24649      | -1.000 | -1.000  | -1.000       |
| fiball             | 0.029    | 0.036    | 442        | 610        | 0.200  | 0.200   | 0.420        |
| gen-ip002          | 0.008    | 0.010    | 88794      | 125319     | 0.197  | 0.197   | 0.397        |
| gen-ip054          | 0.008    | 0.010    | 157950     | 179874     | 0.207  | 0.207   | 0.263        |
| glass-sc           | 0.580    | 0.495    | 200        | 328        | -0.173 | -0.148  | 0.285        |
| glass4             | 1.123    | 1.033    | 37424      | 35671      | -0.087 | -0.080  | -0.123       |
| gmu-35-40          | 0.001    | 0.001    | 28534      | 27077      | 0.402  | 0.398   | 0.276        |
| gmu-35-50          | 0.001    | 0.001    | 16456      | 22333      | 0.177  | 0.176   | 0.346        |
| graph20-20-1rand   | 0.000    | 0.000    | 416        | 283        | 1.000  | 0.000   | 0.000        |
| graphdraw-domain   | 0.421    | 0.430    | 49640      | 56798      | 0.022  | 0.022   | 0.145        |
| ic97_potential     | 0.023    | 0.040    | 39316      | 30633      | 0.415  | 0.415   | 0.247        |
| icir97_tension     | 0.011    | 0.006    | 6697       | 7943       | -0.882 | -0.468  | -0.367       |
| irp                | 0.000    | 0.000    | 6          | 6          | 1.000  | 0.000   | 0.000        |
| istanbul-no-cutoff | 0.514    | 0.393    | 37         | 28         | -0.309 | -0.236  | -0.422       |
| lectsched-5-obj    | $\infty$ | 2.200    | 1192       | 1118       | -1.000 | -1.000  | -1.000       |
| leo1               | 0.118    | 0.113    | 34         | 108        | -0.049 | -0.046  | 0.670        |
| leo2               | 0.345    | 0.135    | 49         | 61         | -1.000 | -0.609  | -0.514       |
| mad                | $\infty$ | $\infty$ | 78783      | 81277      | 0.000  | 0.000   | 0.031        |
| markshare2         | $\infty$ | $\infty$ | 91135      | 127265     | 0.000  | 0.000   | 0.284        |
| markshare.4_0      | $\infty$ | $\infty$ | 570277     | 682069     | 0.000  | 0.000   | 0.164        |
| mas74              | 0.079    | 0.084    | 32005      | 26180      | 0.060  | 0.060   | -0.129       |
| mas76              | 0.014    | 0.015    | 49987      | 52401      | 0.060  | 0.060   | 0.100        |
| mc11               | 0.008    | 0.009    | 333        | 1989       | 0.139  | 0.138   | 0.855        |
| mcsched            | 0.090    | 0.086    | 439        | 1526       | -0.049 | -0.046  | 0.698        |
| mik-250-20-75-4    | 0.000    | 0.000    | 10067      | 10120      | 1.000  | 0.000   | 0.000        |
| mil0-v12-6-r2-40-1 | 0.038    | 0.031    | 340        | 514        | -0.242 | -0.195  | 0.179        |
| momentum1          | 2.868    | 2.868    | 10         | 9          | -0.000 | -0.000  | -0.100       |
| n2seq36q           | 0.665    | 0.665    | 5          | 6          | 0.000  | 0.000   | 0.167        |
| n5-3               | 0.046    | 0.000    | 427        | 595        | -1.000 | -1.000  | -1.000       |
| neos-1171737       | 0.032    | 0.032    | 7          | 13         | 0.000  | 0.000   | 0.462        |
| neos-1445765       | 0.000    | 0.000    | 190        | 263        | 1.000  | 0.000   | 0.000        |
| neos-1456979       | $\infty$ | 0.344    | 204        | 405        | -1.000 | -1.000  | -1.000       |
| neos-1582420       | 0.016    | 0.016    | 11         | 11         | 0.000  | 0.000   | 0.000        |
| neos-2657525-crna  | $\infty$ | $\infty$ | 42826      | 45188      | 0.000  | 0.000   | 0.052        |
| neos-2978193-inde  | 0.013    | 0.013    | 964        | 2178       | 0.000  | 0.000   | 0.557        |
| neos-3004026-krka  | $\infty$ | $\infty$ | 1134       | 1163       | 0.000  | 0.000   | 0.025        |
| neos-3024952-loue  | $\infty$ | $\infty$ | 246        | 377        | 0.000  | 0.000   | 0.347        |
| neos-3046615-murg  | 2.515    | 2.631    | 66921      | 79117      | 0.044  | 0.044   | 0.191        |
| neos-3083819-nubu  | 0.000    | 0.000    | 1683       | 1687       | 1.000  | 0.000   | 0.000        |
| neos-3381206-awhea | 0.000    | 0.000    | 969        | 230        | 1.000  | 0.000   | 0.000        |
| neos-3402294-bobin | $\infty$ | $\infty$ | 10         | 24         | 0.000  | 0.000   | 0.583        |
| neos-3627168-kasai | 0.003    | 0.008    | 6269       | 3338       | 0.577  | 0.577   | 0.205        |
| neos-3754480-nidda | $\infty$ | $\infty$ | 87703      | 106632     | 0.000  | 0.000   | 0.178        |

Continued on next page

| Name                | Gap Ours | Gap Base | Nodes Ours | Nodes Base | Reward       | Utility | Utility/Node |
|---------------------|----------|----------|------------|------------|--------------|---------|--------------|
| neos-4338804-snowy  | 0.024    | 0.028    | 37447      | 36741      | 0.125        | 0.125   | 0.107        |
| neos-4387871-tavua  | 0.631    | 0.634    | 5          | 7          | 0.005        | 0.005   | 0.289        |
| neos-4738912-atrato | 0.016    | 0.006    | 529        | 1064       | -1.000       | -0.634  | -0.265       |
| neos-4954672-berkel | 0.265    | 0.254    | 454        | 775        | -0.043       | -0.041  | 0.389        |
| neos-5093327-huahum | 0.539    | 0.559    | 5          | 6          | 0.036        | 0.036   | 0.197        |
| neos-5107597-kakapo | 2.639    | 5.077    | 1885       | 2332       | 0.480        | 0.480   | 0.580        |
| neos-5188808-nattai | $\infty$ | $\infty$ | 16         | 105        | 0.000        | 0.000   | 0.848        |
| neos-5195221-niemur | 106.417  | 106.417  | 11         | 12         | 0.000        | 0.000   | 0.083        |
| neos-911970         | 0.000    | 0.000    | 3905       | 15109      | 1.000        | 0.000   | 0.000        |
| neos17              | 0.000    | 0.000    | 2151       | 3346       | 1.000        | 0.000   | 0.000        |
| neos5               | 0.062    | 0.059    | 66231      | 91449      | -0.053       | -0.050  | 0.235        |
| neos859080          | 0.000    | 0.000    | 990        | 1227       | 1.000        | 0.000   | 0.000        |
| net12               | 2.592    | 2.114    | 56         | 29         | -0.227       | -0.185  | -0.578       |
| ns1208400           | $\infty$ | $\infty$ | 82         | 150        | 0.000        | 0.000   | 0.453        |
| ns1830653           | 2.831    | 1.242    | 334        | 686        | -1.000       | -0.561  | -0.099       |
| ns1952667           | $\infty$ | $\infty$ | 100        | 52         | 0.000        | 0.000   | -0.480       |
| nu25-pr12           | 0.000    | 0.000    | 119        | 153        | 1.000        | 0.000   | 0.000        |
| nursesched-sprint02 | 0.000    | 0.000    | 9          | 7          | 1.000        | 0.000   | 0.000        |
| nw04                | 0.000    | 0.000    | 6          | 6          | 1.000        | 0.000   | 0.000        |
| pg                  | 0.000    | 0.000    | 460        | 491        | 1.000        | 0.000   | 0.000        |
| pg5_34              | 0.004    | 0.004    | 275        | 592        | -0.023       | -0.022  | 0.524        |
| piperout-08         | 0.000    | 0.000    | 223        | 309        | 1.000        | 0.000   | 0.000        |
| piperout-27         | 0.000    | 0.000    | 47         | 28         | 1.000        | 0.000   | 0.000        |
| pk1                 | 1.244    | 1.117    | 102268     | 120685     | -0.113       | -0.102  | 0.057        |
| radiationm18-12-05  | 0.057    | 0.167    | 886        | 2569       | 0.661        | 0.661   | 0.883        |
| rail507             | 0.033    | 0.033    | 10         | 9          | 0.000        | 0.000   | -0.100       |
| ran14x18-disj-8     | 0.115    | 0.092    | 458        | 975        | -0.251       | -0.200  | 0.412        |
| rd-rplusc-21        | $\infty$ | $\infty$ | 137        | 3542       | 0.000        | 0.000   | 0.961        |
| reblock115          | 0.106    | 0.139    | 80         | 731        | 0.238        | 0.238   | 0.917        |
| rmatri100-p10       | 0.216    | 0.326    | 43         | 74         | 0.337        | 0.337   | 0.615        |
| rocI-4-11           | 0.671    | 0.837    | 12054      | 7909       | 0.198        | 0.198   | -0.181       |
| rocII-5-11          | 3.479    | 1.568    | 164        | 287        | -1.000       | -0.549  | -0.211       |
| rococoB10-011000    | 1.244    | 1.258    | 12         | 26         | 0.012        | 0.012   | 0.544        |
| rococoC10-001000    | 0.337    | 0.153    | 135        | 866        | -1.000       | -0.546  | 0.656        |
| roll3000            | 0.000    | 0.000    | 1156       | 2046       | 1.000        | 0.000   | 0.000        |
| sct2                | 0.001    | 0.002    | 2117       | 1215       | 0.619        | 0.615   | 0.332        |
| seymour             | 0.044    | 0.035    | 176        | 563        | -0.243       | -0.195  | 0.611        |
| seymour1            | 0.003    | 0.003    | 329        | 885        | 0.146        | 0.145   | 0.682        |
| sp150x300d          | 0.000    | 0.000    | 148        | 124        | 1.000        | 0.000   | 0.000        |
| supportcase18       | 0.081    | 0.081    | 178        | 1372       | 0.000        | -0.000  | 0.870        |
| supportcase26       | 0.224    | 0.231    | 11191      | 20287      | 0.031        | 0.031   | 0.465        |
| supportcase33       | 27.788   | 0.371    | 15         | 28         | -1.000       | -0.987  | -0.975       |
| supportcase40       | 0.086    | 0.094    | 50         | 111        | 0.087        | 0.087   | 0.589        |
| supportcase42       | 0.033    | 0.050    | 76         | 256        | 0.340        | 0.340   | 0.804        |
| swath1              | 0.000    | 0.000    | 311        | 372        | 1.000        | 0.000   | 0.000        |
| swath3              | 0.110    | 0.113    | 1442       | 2800       | 0.020        | 0.020   | 0.495        |
| timtab1             | 0.126    | 0.094    | 22112      | 25367      | -0.333       | -0.250  | -0.139       |
| tr12-30             | 0.002    | 0.002    | 8941       | 14896      | 0.019        | 0.019   | 0.394        |
| traininstance2      | $\infty$ | $\infty$ | 412        | 821        | 0.000        | 0.000   | 0.498        |
| traininstance6      | 29.355   | $\infty$ | 2549       | 6376       | 1.000        | 1.000   | 1.000        |
| trento1             | 3.885    | 3.885    | 4          | 7          | -0.000       | -0.000  | 0.429        |
| uct-subprob         | 0.249    | 0.195    | 225        | 263        | -0.276       | -0.216  | -0.084       |
| var-smallemery-m6j6 | 0.062    | 0.062    | 95         | 224        | -0.002       | -0.002  | 0.575        |
| wachplan            | 0.125    | 0.125    | 422        | 712        | 0.000        | 0.000   | 0.407        |
| Mean                | —        | —        | 16538      | 19673      | <b>0.140</b> | -0.013  | <b>0.208</b> |

### D.3 MINLPLIB RESULTS

Table 5: Results on MINLPLIB (Bussieck et al., 2003) after 45s runtime. Note that we filter out problems in which less than 5 nodes were explored as those problems cannot gain meaningful advantages even with perfect node selection. “Name” refers to the instances name, “Gap Base/Ours” corresponds to the optimization gap achieved by the baseline and our method respectively (lower is better), “Nodes Base/Ours” to the number of explored Nodes by each method, and “Reward”, “Utility” and “Utility Node” to the different performance measures as described in Section 5. For all three measures, higher is better.

| Name        | Gap Ours | Gap Base | Nodes Ours | Nodes Base | Reward | Utility | Utility/Node |
|-------------|----------|----------|------------|------------|--------|---------|--------------|
| ball_mk4_05 | 0.000    | 0.000    | 1819       | 1869       | 1.000  | 0.000   | 0.000        |
| ball_mk4_10 | $\infty$ | $\infty$ | 31684      | 37656      | 0.000  | 0.000   | 0.159        |

Continued on next page

| Name                        | Gap Ours | Gap Base | Nodes Ours | Nodes Base | Reward | Utility | Utility/Node |
|-----------------------------|----------|----------|------------|------------|--------|---------|--------------|
| ball_mk4_15                 | $\infty$ | $\infty$ | 1773       | 2415       | 0.000  | 0.000   | 0.266        |
| bayes2_20                   | $\infty$ | $\infty$ | 3171       | 2719       | 0.000  | 0.000   | -0.143       |
| bayes2_30                   | $\infty$ | $\infty$ | 4462       | 4992       | 0.000  | 0.000   | 0.106        |
| bayes2_50                   | $\infty$ | $\infty$ | 2934       | 2530       | 0.000  | 0.000   | -0.138       |
| blend029                    | 0.000    | 0.000    | 812        | 804        | 1.000  | 0.000   | 0.000        |
| blend146                    | 0.097    | 0.105    | 12390      | 18066      | 0.075  | 0.075   | 0.365        |
| blend480                    | 0.071    | 0.000    | 4878       | 6312       | -1.000 | -1.000  | -0.999       |
| blend531                    | 0.000    | 0.000    | 3150       | 7161       | 1.000  | 0.000   | 0.000        |
| blend718                    | 0.898    | 0.796    | 22652      | 26060      | -0.127 | -0.113  | 0.020        |
| blend721                    | 0.000    | 0.000    | 4650       | 2708       | 1.000  | 0.000   | 0.000        |
| blend852                    | 0.021    | 0.000    | 7726       | 5413       | -1.000 | -1.000  | -0.997       |
| camshape100                 | 0.076    | 0.074    | 18839      | 22205      | -0.027 | -0.026  | 0.128        |
| camshape200                 | 0.145    | 0.147    | 8199       | 9921       | 0.012  | 0.012   | 0.183        |
| camshape400                 | 0.198    | 0.195    | 4324       | 5275       | -0.016 | -0.016  | 0.167        |
| camshape800                 | 0.222    | 0.226    | 1504       | 1627       | 0.019  | 0.019   | 0.093        |
| cardqp_inlp                 | 1.436    | 1.660    | 4316       | 7232       | 0.135  | 0.135   | 0.484        |
| cardqp_iqp                  | 1.089    | 1.660    | 4766       | 7285       | 0.344  | 0.344   | 0.571        |
| carton7                     | 0.000    | 0.000    | 55         | 73         | 1.000  | 0.000   | 0.000        |
| carton9                     | 0.000    | 0.000    | 9848       | 7406       | 1.000  | 0.000   | 0.000        |
| catmix100                   | $\infty$ | $\infty$ | 186        | 8750       | 0.000  | 0.000   | 0.979        |
| catmix200                   | $\infty$ | $\infty$ | 123        | 3870       | 0.000  | 0.000   | 0.968        |
| catmix400                   | $\infty$ | $\infty$ | 146        | 3498       | 0.000  | 0.000   | 0.958        |
| catmix800                   | $\infty$ | $\infty$ | 75         | 333        | 0.000  | 0.000   | 0.775        |
| celar6-sub0                 | $\infty$ | $\infty$ | 4          | 6          | 0.000  | 0.000   | 0.333        |
| chimera_k64ising-01         | 0.701    | 16.469   | 18         | 21         | 0.957  | 0.957   | 0.964        |
| chimera_k64maxcut-01        | 0.523    | 0.199    | 57         | 198        | -1.000 | -0.618  | 0.246        |
| chimera_k64maxcut-02        | 0.368    | 0.239    | 72         | 381        | -0.536 | -0.349  | 0.710        |
| chimera_lga-02              | 0.893    | 0.893    | 5          | 6          | 0.000  | 0.000   | 0.167        |
| chimera_mgw-c8-439-onc8-001 | 0.045    | 0.021    | 127        | 521        | -1.000 | -0.529  | 0.482        |
| chimera_mgw-c8-439-onc8-002 | 0.067    | 0.046    | 72         | 526        | -0.449 | -0.310  | 0.802        |
| chimera_mgw-c8-507-onc8-01  | 0.232    | 0.233    | 26         | 99         | 0.003  | 0.003   | 0.738        |
| chimera_mgw-c8-507-onc8-02  | 0.188    | 0.346    | 14         | 25         | 0.455  | 0.455   | 0.695        |
| chimera_mis-01              | 0.000    | 0.000    | 7          | 7          | 1.000  | 0.000   | 0.000        |
| chimera_mis-02              | 0.000    | 0.000    | 7          | 7          | 1.000  | 0.000   | 0.000        |
| chimera_rfr-01              | 1.029    | 1.153    | 70         | 61         | 0.108  | 0.108   | -0.023       |
| chimera_rfr-02              | 1.148    | 1.061    | 74         | 63         | -0.082 | -0.076  | -0.213       |
| chimera_selby-c8-onc8-01    | 0.436    | 0.224    | 34         | 111        | -0.941 | -0.485  | 0.406        |
| chimera_selby-c8-onc8-02    | 0.439    | 0.232    | 40         | 92         | -0.895 | -0.472  | 0.176        |
| clay0203m                   | 0.000    | 0.000    | 19         | 30         | 1.000  | 0.000   | 0.000        |
| clay0204m                   | 0.000    | 0.000    | 266        | 400        | 1.000  | 0.000   | 0.000        |
| clay0205m                   | 0.000    | 0.000    | 4058       | 3908       | 1.000  | 0.000   | 0.000        |
| clay0303m                   | 0.000    | 0.000    | 107        | 45         | 1.000  | 0.000   | 0.000        |
| clay0304m                   | 0.000    | 0.000    | 337        | 897        | 1.000  | 0.000   | 0.000        |
| clay0305m                   | 0.000    | 0.000    | 4057       | 4204       | 1.000  | 0.000   | 0.000        |
| color_lab3_3x0              | 1.445    | 1.725    | 320        | 576        | 0.162  | 0.162   | 0.534        |
| color_lab3_4x0              | 5.581    | 5.455    | 265        | 434        | -0.023 | -0.023  | 0.375        |
| crossdock_15x7              | 4.457    | 8.216    | 654        | 1080       | 0.458  | 0.458   | 0.672        |
| crossdock_15x8              | 8.578    | 84.148   | 391        | 717        | 0.898  | 0.898   | 0.944        |
| crudeoil_lee1_06            | 0.000    | 0.000    | 48         | 57         | 1.000  | 0.000   | 0.000        |
| crudeoil_lee1_07            | 0.000    | 0.000    | 57         | 92         | 1.000  | 0.000   | 0.000        |
| crudeoil_lee1_08            | 0.000    | 0.000    | 161        | 121        | 1.000  | 0.000   | 0.000        |
| crudeoil_lee1_09            | 0.000    | 0.000    | 107        | 99         | 1.000  | 0.000   | 0.000        |
| crudeoil_lee1_10            | 0.000    | 0.000    | 78         | 109        | 1.000  | 0.000   | 0.000        |
| crudeoil_lee2_05            | 0.000    | 0.000    | 10         | 11         | 1.000  | 0.000   | 0.000        |
| crudeoil_lee2_06            | 0.000    | 0.000    | 45         | 109        | 1.000  | 0.000   | 0.000        |
| crudeoil_lee2_07            | 0.000    | 0.000    | 286        | 81         | 1.000  | 0.000   | 0.000        |
| crudeoil_lee2_08            | 0.000    | 0.000    | 150        | 308        | 1.000  | 0.000   | 0.000        |
| crudeoil_lee2_09            | 0.142    | 0.015    | 44         | 41         | -1.000 | -0.897  | -0.904       |
| crudeoil_lee3_05            | 0.000    | 0.000    | 1435       | 1820       | 1.000  | 0.000   | 0.000        |
| crudeoil_lee3_06            | 0.057    | 0.013    | 352        | 1349       | -1.000 | -0.764  | -0.095       |
| crudeoil_lee4_05            | 0.000    | 0.000    | 306        | 118        | 1.000  | 0.000   | 0.000        |
| crudeoil_lee4_06            | 0.000    | 0.000    | 129        | 60         | 1.000  | 0.000   | 0.000        |
| crudeoil_lee4_07            | 0.000    | 0.000    | 193        | 89         | 1.000  | 0.000   | 0.000        |
| crudeoil_lee4_08            | 0.000    | 0.001    | 41         | 53         | 0.187  | 0.184   | 0.371        |
| crudeoil_li01               | 0.049    | 0.017    | 16819      | 11797      | -1.000 | -0.657  | -0.758       |
| crudeoil_li02               | 0.013    | 0.013    | 12172      | 10426      | -0.027 | -0.027  | -0.165       |
| crudeoil_li03               | $\infty$ | $\infty$ | 198        | 899        | 0.000  | 0.000   | 0.780        |
| crudeoil_li05               | 0.157    | 0.142    | 553        | 1031       | -0.104 | -0.095  | 0.408        |
| crudeoil_li06               | $\infty$ | $\infty$ | 41         | 322        | 0.000  | 0.000   | 0.873        |
| crudeoil_li11               | $\infty$ | $\infty$ | 20         | 70         | 0.000  | 0.000   | 0.714        |
| crudeoil_pooling_ct1        | 0.943    | 0.988    | 2415       | 6356       | 0.046  | 0.046   | 0.638        |
| crudeoil_pooling_ct2        | 0.000    | 0.000    | 1480       | 1589       | 1.000  | 0.000   | 0.000        |
| crudeoil_pooling_ct3        | 42.222   | 120.618  | 101        | 101        | 0.650  | 0.650   | 0.650        |
| crudeoil_pooling_ct4        | 0.000    | 0.000    | 7631       | 9217       | 0.365  | 0.153   | 0.041        |
| du-opt                      | 0.000    | 0.000    | 11282      | 14174      | 1.000  | 0.000   | 0.000        |
| du-opt5                     | 0.000    | 0.000    | 83         | 60         | 1.000  | 0.000   | 0.000        |
| edgecross10-030             | 0.000    | 0.000    | 7          | 7          | 1.000  | 0.000   | 0.000        |

Continued on next page

| Name                    | Gap Ours | Gap Base | Nodes Ours | Nodes Base | Reward | Utility | Utility/Node |
|-------------------------|----------|----------|------------|------------|--------|---------|--------------|
| edgexross10-040         | 0.000    | 0.000    | 30         | 39         | 1.000  | 0.000   | 0.000        |
| edgexross10-050         | 0.000    | 0.000    | 487        | 469        | 1.000  | 0.000   | 0.000        |
| edgexross10-060         | 0.000    | 0.000    | 2058       | 2138       | 1.000  | 0.000   | 0.000        |
| edgexross10-070         | 0.321    | 0.220    | 255        | 329        | -0.457 | -0.314  | -0.115       |
| edgexross10-080         | 0.077    | 0.077    | 352        | 668        | 0.001  | 0.001   | 0.474        |
| edgexross10-090         | 0.000    | 0.000    | 7          | 6          | 1.000  | 0.000   | 0.000        |
| edgexross14-039         | 0.000    | 0.000    | 624        | 731        | 1.000  | 0.000   | 0.000        |
| edgexross14-058         | 1.251    | 0.549    | 84         | 157        | -1.000 | -0.561  | -0.180       |
| edgexross14-078         | 1.843    | 1.865    | 12         | 14         | 0.012  | 0.012   | 0.153        |
| edgexross14-098         | 1.120    | 1.129    | 24         | 31         | 0.007  | 0.007   | 0.232        |
| edgexross14-117         | 0.963    | 0.947    | 9          | 17         | -0.017 | -0.017  | 0.462        |
| edgexross14-137         | 0.537    | 0.552    | 20         | 30         | 0.028  | 0.028   | 0.352        |
| edgexross14-156         | 0.338    | 0.353    | 13         | 13         | 0.042  | 0.042   | 0.042        |
| edgexross14-176         | 0.089    | 0.080    | 37         | 135        | -0.117 | -0.105  | 0.694        |
| edgexross20-040         | 0.000    | 0.000    | 71         | 57         | 1.000  | 0.000   | 0.000        |
| edgexross20-080         | 3.943    | 3.943    | 7          | 7          | 0.000  | 0.000   | 0.000        |
| edgexross22-048         | 0.615    | 0.000    | 56         | 81         | -1.000 | -1.000  | -1.000       |
| edgexross24-057         | 5.219    | 5.219    | 7          | 6          | 0.000  | 0.000   | -0.143       |
| elf                     | 0.000    | 0.000    | 115        | 112        | 1.000  | 0.000   | 0.000        |
| ex2.1.1                 | 0.000    | 0.000    | 17         | 17         | 1.000  | 0.000   | 0.000        |
| ex2.1.10                | 0.000    | 0.000    | 13         | 11         | 1.000  | 0.000   | 0.000        |
| ex2.1.5                 | 0.000    | 0.000    | 17         | 19         | 1.000  | 0.000   | 0.000        |
| ex2.1.6                 | 0.000    | 0.000    | 13         | 13         | 1.000  | 0.000   | 0.000        |
| ex2.1.7                 | 0.000    | 0.000    | 1523       | 1831       | 1.000  | 0.000   | 0.000        |
| ex2.1.8                 | 0.000    | 0.000    | 75         | 93         | 1.000  | 0.000   | 0.000        |
| ex2.1.9                 | 0.000    | 0.000    | 3735       | 3947       | 1.000  | 0.000   | 0.000        |
| ex3.1.1                 | 0.000    | 0.000    | 405        | 271        | 1.000  | 0.000   | 0.000        |
| ex3.1.3                 | 0.000    | 0.000    | 21         | 27         | 1.000  | 0.000   | 0.000        |
| ex3.1.4                 | 0.000    | 0.000    | 23         | 23         | 1.000  | 0.000   | 0.000        |
| ex4                     | 0.000    | 0.000    | 23         | 29         | 1.000  | 0.000   | 0.000        |
| ex5.2.2.case1           | 0.000    | 0.000    | 39         | 19         | 1.000  | 0.000   | 0.000        |
| ex5.2.2.case2           | 0.000    | 0.000    | 57         | 31         | 1.000  | 0.000   | 0.000        |
| ex5.2.4                 | 0.000    | 0.000    | 251        | 227        | 1.000  | 0.000   | 0.000        |
| ex5.2.5                 | 0.359    | 0.346    | 30403      | 33492      | -0.038 | -0.036  | 0.058        |
| ex5.3.2                 | 0.000    | 0.000    | 33         | 31         | 1.000  | 0.000   | 0.000        |
| ex5.3.3                 | 0.339    | 0.331    | 29464      | 31558      | -0.024 | -0.024  | 0.044        |
| ex5.4.2                 | 0.000    | 0.000    | 41         | 35         | 1.000  | 0.000   | 0.000        |
| ex8.3.2                 | 23.252   | 23.608   | 8907       | 8680       | 0.015  | 0.015   | -0.011       |
| ex8.3.3                 | 23.004   | 23.004   | 9636       | 10365      | 0.000  | 0.000   | 0.070        |
| ex8.3.4                 | 1.817    | 1.793    | 9447       | 9563       | -0.013 | -0.013  | -0.001       |
| ex8.3.5                 | 143.677  | 143.677  | 9427       | 9699       | 0.000  | 0.000   | 0.028        |
| ex8.3.8                 | 2.071    | 2.071    | 2293       | 3677       | 0.000  | 0.000   | 0.376        |
| ex8.3.9                 | 12.106   | 12.106   | 14272      | 17310      | 0.000  | -0.000  | 0.176        |
| ex8.4.1                 | 0.000    | 0.000    | 670        | 650        | 1.000  | 0.000   | 0.000        |
| ex9.2.3                 | 0.000    | 0.000    | 25         | 31         | 1.000  | 0.000   | 0.000        |
| ex9.2.5                 | 0.000    | 0.000    | 27         | 29         | 1.000  | 0.000   | 0.000        |
| ex9.2.7                 | 0.000    | 0.000    | 11         | 11         | 1.000  | 0.000   | 0.000        |
| fac1ay20h               | 1.727    | 1.727    | 16         | 15         | 0.000  | 0.000   | -0.062       |
| fac1ay25                | 2.468    | 2.468    | 6          | 6          | 0.000  | 0.000   | 0.000        |
| forest                  | 0.003    | 0.020    | 29002      | 25913      | 0.860  | 0.859   | 0.831        |
| gabriel01               | 0.139    | 0.139    | 6753       | 9744       | -0.000 | -0.000  | 0.307        |
| gabriel02               | 0.556    | 0.585    | 1107       | 1675       | 0.050  | 0.050   | 0.372        |
| gabriel04               | $\infty$ | 1.308    | 129        | 285        | -1.000 | -1.000  | -1.000       |
| gabriel05               | $\infty$ | $\infty$ | 141        | 326        | 0.000  | 0.000   | 0.567        |
| gasprod_sarawak01       | 0.000    | 0.000    | 11         | 6          | 1.000  | 0.000   | 0.000        |
| gasprod_sarawak16       | 0.004    | 0.009    | 506        | 1052       | 0.585  | 0.585   | 0.800        |
| genpooling_lee1         | 0.000    | 0.000    | 690        | 676        | 1.000  | 0.000   | 0.000        |
| genpooling_lee2         | 0.000    | 0.000    | 1299       | 2989       | 1.000  | 0.000   | 0.000        |
| genpooling_meyer04      | 0.957    | 0.691    | 12855      | 17889      | -0.385 | -0.278  | 0.005        |
| genpooling_meyer10      | 1.276    | 1.385    | 1910       | 2815       | 0.078  | 0.078   | 0.375        |
| genpooling_meyer15      | 6.080    | 0.691    | 97         | 413        | -1.000 | -0.886  | -0.516       |
| graphpart.2g-0099-9211  | 0.000    | 0.000    | 18         | 14         | 1.000  | 0.000   | 0.000        |
| graphpart.2pm-0077-0777 | 0.000    | 0.000    | 5          | 6          | 1.000  | 0.000   | 0.000        |
| graphpart.2pm-0088-0888 | 0.000    | 0.000    | 9          | 7          | 1.000  | 0.000   | 0.000        |
| graphpart.2pm-0099-0999 | 0.000    | 0.000    | 16         | 12         | 1.000  | 0.000   | 0.000        |
| graphpart.3g-0334-0334  | 0.000    | 0.000    | 21         | 41         | 1.000  | 0.000   | 0.000        |
| graphpart.3g-0344-0344  | 0.000    | 0.000    | 61         | 19         | 1.000  | 0.000   | 0.000        |
| graphpart.3g-0444-0444  | 0.000    | 0.000    | 424        | 562        | 1.000  | 0.000   | 0.000        |
| graphpart.3pm-0244-0244 | 0.000    | 0.000    | 21         | 15         | 1.000  | 0.000   | 0.000        |
| graphpart.3pm-0334-0334 | 0.000    | 0.000    | 20         | 38         | 1.000  | 0.000   | 0.000        |
| graphpart.3pm-0344-0344 | 0.000    | 0.000    | 590        | 619        | 1.000  | 0.000   | 0.000        |
| graphpart.3pm-0444-0444 | 0.058    | 0.000    | 755        | 1348       | -1.000 | -1.000  | -1.000       |
| graphpart.clique-20     | 0.000    | 0.000    | 22         | 24         | 1.000  | 0.000   | 0.000        |
| graphpart.clique-30     | 0.000    | 0.000    | 421        | 337        | 1.000  | 0.000   | 0.000        |
| graphpart.clique-40     | 1.018    | 0.920    | 297        | 609        | -0.106 | -0.096  | 0.461        |
| graphpart.clique-50     | 5.638    | 6.032    | 97         | 191        | 0.065  | 0.065   | 0.525        |
| graphpart.clique-60     | 17.434   | 9.335    | 109        | 204        | -0.868 | -0.465  | 0.002        |

Continued on next page

| Name                         | Gap Ours | Gap Base | Nodes Ours | Nodes Base | Reward | Utility | Utility/Node |
|------------------------------|----------|----------|------------|------------|--------|---------|--------------|
| graphpart_clique-70          | 30.409   | 35.053   | 16         | 27         | 0.132  | 0.132   | 0.486        |
| haverly                      | 0.000    | 0.000    | 45         | 57         | 1.000  | 0.000   | 0.000        |
| himmel16                     | 0.000    | 0.000    | 2193       | 2089       | 1.000  | 0.000   | 0.000        |
| house                        | 0.000    | 0.000    | 58675      | 58399      | 1.000  | 0.000   | 0.000        |
| hvb11                        | 0.018    | 0.182    | 19172      | 15631      | 0.899  | 0.899   | 0.875        |
| hydroenergy1                 | 0.007    | 0.007    | 15060      | 18149      | -0.088 | -0.081  | 0.095        |
| hydroenergy2                 | 0.016    | 0.016    | 4834       | 6712       | 0.038  | 0.038   | 0.306        |
| hydroenergy3                 | 0.022    | 0.023    | 565        | 1060       | 0.006  | 0.006   | 0.470        |
| ising2.5-300_5555            | 0.508    | 0.407    | 57         | 220        | -0.248 | -0.199  | 0.677        |
| kall_circles_c6a             | 3.180    | 2.094    | 42813      | 46497      | -0.519 | -0.342  | -0.285       |
| kall_circles_c6b             | 2.635    | 1.452    | 38722      | 45596      | -0.815 | -0.449  | -0.351       |
| kall_circles_c6c             | $\infty$ | $\infty$ | 33357      | 36374      | 0.000  | 0.000   | 0.083        |
| kall_circles_c7a             | 1.482    | 1.376    | 38682      | 43723      | -0.077 | -0.072  | 0.047        |
| kall_circles_c8a             | $\infty$ | $\infty$ | 32114      | 36262      | 0.000  | 0.000   | 0.114        |
| kall_circlespolygons.c1p12   | 0.000    | 0.000    | 44439      | 64102      | -1.000 | -0.733  | -0.106       |
| kall_circlespolygons.c1p13   | 0.000    | 0.000    | 8621       | 7914       | 1.000  | 0.000   | 0.000        |
| kall_circlespolygons.c1p5a   | $\infty$ | $\infty$ | 12369      | 13200      | 0.000  | 0.000   | 0.063        |
| kall_circlespolygons.c1p6a   | $\infty$ | $\infty$ | 404        | 628        | 0.000  | 0.000   | 0.357        |
| kall_circlesrectangles.c1r12 | 0.000    | 0.000    | 42587      | 48285      | 0.121  | 0.114   | 0.061        |
| kall_circlesrectangles.c1r13 | 0.000    | 0.000    | 4372       | 3739       | 1.000  | 0.000   | 0.000        |
| kall_circlesrectangles.c6r1  | $\infty$ | $\infty$ | 5850       | 7908       | 0.000  | 0.000   | 0.260        |
| kall_circlesrectangles.c6r29 | $\infty$ | $\infty$ | 4181       | 5220       | 0.000  | 0.000   | 0.199        |
| kall_circlesrectangles.c6r39 | $\infty$ | $\infty$ | 2570       | 2966       | 0.000  | 0.000   | 0.134        |
| kall_congruentcircles.c31    | 0.000    | 0.000    | 101        | 95         | 1.000  | 0.000   | 0.000        |
| kall_congruentcircles.c32    | 0.000    | 0.000    | 133        | 139        | 1.000  | 0.000   | 0.000        |
| kall_congruentcircles.c41    | 0.000    | 0.000    | 27         | 31         | 1.000  | 0.000   | 0.000        |
| kall_congruentcircles.c42    | 0.000    | 0.000    | 205        | 125        | 1.000  | 0.000   | 0.000        |
| kall_congruentcircles.c51    | 0.000    | 0.000    | 4197       | 4987       | 1.000  | 0.000   | 0.000        |
| kall_congruentcircles.c52    | 0.000    | 0.000    | 1767       | 1446       | 1.000  | 0.000   | 0.000        |
| kall_congruentcircles.c61    | 0.000    | 0.000    | 27338      | 35199      | 1.000  | 0.000   | 0.000        |
| kall_congruentcircles.c62    | 0.000    | 0.000    | 2879       | 6037       | 1.000  | 0.000   | 0.000        |
| kall_congruentcircles.c63    | 0.000    | 0.000    | 2043       | 1729       | 1.000  | 0.000   | 0.000        |
| kall_congruentcircles.c71    | $\infty$ | $\infty$ | 39102      | 43349      | 0.000  | 0.000   | 0.098        |
| kall_congruentcircles.c72    | 0.000    | 0.000    | 14686      | 14089      | 1.000  | 0.000   | 0.000        |
| kall_diffcircles.10          | 2.276    | 4.054    | 32475      | 41241      | 0.439  | 0.439   | 0.558        |
| kall_diffcircles.5a          | 0.000    | 0.000    | 2020       | 1218       | 1.000  | 0.000   | 0.000        |
| kall_diffcircles.5b          | 0.000    | 0.000    | 6360       | 5774       | 1.000  | 0.000   | 0.000        |
| kall_diffcircles.6           | 0.000    | 0.000    | 2827       | 2383       | 1.000  | 0.000   | 0.000        |
| kall_diffcircles.7           | 0.000    | 0.000    | 9408       | 9518       | 1.000  | 0.000   | 0.000        |
| kall_diffcircles.8           | 0.406    | 0.219    | 48924      | 57747      | -0.851 | -0.460  | -0.362       |
| kall_diffcircles.9           | 1.676    | 1.052    | 42056      | 48915      | -0.594 | -0.373  | -0.270       |
| kn3-12                       | 1.846    | 1.963    | 1987       | 2132       | 0.060  | 0.060   | 0.124        |
| lop97ic                      | $\infty$ | $\infty$ | 19         | 33         | 0.000  | 0.000   | 0.424        |
| lop97icx                     | 0.008    | 0.000    | 3041       | 1711       | -1.000 | -0.999  | -0.998       |
| maxcsp-langford-3-11         | $\infty$ | $\infty$ | 1356       | 4038       | 0.000  | 0.000   | 0.664        |
| ndcc12                       | $\infty$ | $\infty$ | 1394       | 3975       | 0.000  | 0.000   | 0.649        |
| ndcc12persp                  | $\infty$ | $\infty$ | 1092       | 2994       | 0.000  | 0.000   | 0.635        |
| ndcc13                       | $\infty$ | $\infty$ | 298        | 787        | 0.000  | 0.000   | 0.621        |
| ndcc13persp                  | 0.536    | 0.546    | 2982       | 5662       | 0.018  | 0.018   | 0.483        |
| ndcc14                       | 1.030    | 1.048    | 234        | 499        | 0.018  | 0.018   | 0.539        |
| ndcc14persp                  | 1.044    | 1.080    | 572        | 1052       | 0.033  | 0.033   | 0.474        |
| ndcc15                       | $\infty$ | $\infty$ | 1293       | 2120       | 0.000  | 0.000   | 0.390        |
| ndcc15persp                  | $\infty$ | $\infty$ | 5227       | 6549       | 0.000  | 0.000   | 0.202        |
| ndcc16                       | $\infty$ | $\infty$ | 407        | 396        | 0.000  | 0.000   | -0.027       |
| ndcc16persp                  | $\infty$ | $\infty$ | 1035       | 2183       | 0.000  | 0.000   | 0.526        |
| netmod.dol2                  | 0.047    | 0.000    | 112        | 250        | -1.000 | -1.000  | -1.000       |
| netmod.kar1                  | 0.000    | 0.000    | 425        | 285        | 1.000  | 0.000   | 0.000        |
| netmod.kar2                  | 0.000    | 0.000    | 275        | 285        | 1.000  | 0.000   | 0.000        |
| nous1                        | 0.000    | 0.000    | 3092       | 2816       | 1.000  | 0.000   | 0.000        |
| nous2                        | 0.000    | 0.000    | 81         | 71         | 1.000  | 0.000   | 0.000        |
| nuclearvb                    | $\infty$ | $\infty$ | 1821       | 3817       | 0.000  | 0.000   | 0.523        |
| nuclearvc                    | $\infty$ | $\infty$ | 1905       | 1530       | 0.000  | 0.000   | -0.197       |
| nuclearvd                    | $\infty$ | $\infty$ | 3781       | 2521       | 0.000  | 0.000   | -0.333       |
| nuclearve                    | $\infty$ | $\infty$ | 877        | 5464       | 0.000  | 0.000   | 0.839        |
| nuclearvf                    | $\infty$ | $\infty$ | 256        | 3596       | 0.000  | 0.000   | 0.929        |
| nvs13                        | 0.000    | 0.000    | 9          | 9          | 1.000  | 0.000   | 0.000        |
| nvs17                        | 0.000    | 0.000    | 89         | 78         | 1.000  | 0.000   | 0.000        |
| nvs18                        | 0.000    | 0.000    | 121        | 75         | 1.000  | 0.000   | 0.000        |
| nvs19                        | 0.000    | 0.000    | 161        | 154        | 1.000  | 0.000   | 0.000        |
| nvs23                        | 0.000    | 0.000    | 465        | 523        | 1.000  | 0.000   | 0.000        |
| nvs24                        | 0.000    | 0.000    | 2060       | 1944       | 1.000  | 0.000   | 0.000        |
| p.ball.10b.5p.2d.m           | 0.000    | 0.000    | 353        | 326        | 1.000  | 0.000   | 0.000        |
| p.ball.10b.5p.3d.m           | 0.000    | 0.000    | 1204       | 1032       | 1.000  | 0.000   | 0.000        |
| p.ball.10b.5p.4d.m           | 0.000    | 0.000    | 1424       | 1765       | 1.000  | 0.000   | 0.000        |
| p.ball.10b.7p.3d.m           | 0.000    | 0.000    | 6178       | 6151       | 1.000  | 0.000   | 0.000        |
| p.ball.15b.5p.2d.m           | 0.000    | 0.000    | 1377       | 2068       | 1.000  | 0.000   | 0.000        |
| p.ball.20b.5p.2d.m           | 0.000    | 0.000    | 1610       | 2039       | 1.000  | 0.000   | 0.000        |

Continued on next page



| Name                    | Gap Ours | Gap Base | Nodes Ours | Nodes Base | Reward | Utility | Utility/Node |
|-------------------------|----------|----------|------------|------------|--------|---------|--------------|
| p_ball_20b_5p_3d_m      | 0.000    | 0.000    | 10647      | 11510      | 1.000  | 0.000   | 0.000        |
| p_ball_30b_10p_2d_m     | ∞        | ∞        | 3795       | 4965       | 0.000  | 0.000   | 0.236        |
| p_ball_30b_5p_2d_m      | 0.000    | 0.000    | 2827       | 3275       | 1.000  | 0.000   | 0.000        |
| p_ball_30b_5p_3d_m      | 0.000    | 0.000    | 10150      | 11489      | 1.000  | 0.000   | 0.000        |
| p_ball_30b_7p_2d_m      | ∞        | ∞        | 8511       | 11906      | 0.000  | 0.000   | 0.285        |
| p_ball_40b_5p_3d_m      | ∞        | ∞        | 9620       | 13718      | 0.000  | 0.000   | 0.299        |
| p_ball_40b_5p_4d_m      | ∞        | ∞        | 8100       | 11826      | 0.000  | 0.000   | 0.315        |
| pedigree_ex485          | 0.019    | 0.019    | 315        | 962        | 0.030  | 0.030   | 0.682        |
| pedigree_ex485_2        | 0.000    | 0.000    | 121        | 344        | 1.000  | 0.000   | 0.000        |
| pedigree_sim400         | 0.061    | 0.053    | 1094       | 1533       | -0.156 | -0.135  | 0.175        |
| pedigree_sp_top4_250    | 0.053    | 0.036    | 61         | 173        | -0.482 | -0.325  | 0.477        |
| pedigree_sp_top4_300    | 0.014    | 0.015    | 294        | 670        | 0.014  | 0.014   | 0.567        |
| pedigree_sp_top4_350tr  | 0.000    | 0.014    | 365        | 1096       | 1.000  | 0.999   | 1.000        |
| pedigree_sp_top5_250    | 0.050    | 0.057    | 28         | 39         | 0.125  | 0.125   | 0.372        |
| pinene200               | ∞        | ∞        | 12         | 12         | 0.000  | 0.000   | 0.000        |
| pointpack06             | 0.000    | 0.000    | 2099       | 2051       | 1.000  | 0.000   | 0.000        |
| pointpack08             | 0.015    | 0.000    | 35620      | 34315      | -1.000 | -0.999  | -0.978       |
| pointpack10             | 0.612    | 0.613    | 18366      | 22179      | 0.001  | 0.001   | 0.173        |
| pointpack12             | 0.854    | 0.839    | 15197      | 17796      | -0.018 | -0.018  | 0.131        |
| pointpack14             | 1.535    | 1.537    | 8919       | 9550       | 0.001  | 0.001   | 0.067        |
| pooling_adhya1pq        | 0.000    | 0.000    | 383        | 365        | 1.000  | 0.000   | 0.000        |
| pooling_adhya1stp       | 0.000    | 0.000    | 737        | 638        | 1.000  | 0.000   | 0.000        |
| pooling_adhya1tp        | 0.000    | 0.000    | 611        | 806        | 1.000  | 0.000   | 0.000        |
| pooling_adhya2pq        | 0.000    | 0.000    | 569        | 588        | 1.000  | 0.000   | 0.000        |
| pooling_adhya2stp       | 0.000    | 0.000    | 832        | 934        | 1.000  | 0.000   | 0.000        |
| pooling_adhya2tp        | 0.000    | 0.000    | 345        | 288        | 1.000  | 0.000   | 0.000        |
| pooling_adhya3pq        | 0.000    | 0.000    | 377        | 289        | 1.000  | 0.000   | 0.000        |
| pooling_adhya3stp       | 0.000    | 0.000    | 834        | 1078       | 1.000  | 0.000   | 0.000        |
| pooling_adhya3tp        | 0.000    | 0.000    | 675        | 585        | 1.000  | 0.000   | 0.000        |
| pooling_adhya4pq        | 0.000    | 0.000    | 274        | 150        | 1.000  | 0.000   | 0.000        |
| pooling_adhya4stp       | 0.000    | 0.000    | 385        | 686        | 1.000  | 0.000   | 0.000        |
| pooling_adhya4tp        | 0.000    | 0.000    | 317        | 387        | 1.000  | 0.000   | 0.000        |
| pooling_bental5stp      | 0.000    | 0.000    | 2818       | 4434       | 1.000  | 0.000   | 0.000        |
| pooling_digabel16       | 0.000    | 0.000    | 27577      | 35207      | -1.000 | -0.715  | -0.160       |
| pooling_digabel18       | 0.013    | 0.008    | 4109       | 5110       | -0.496 | -0.331  | -0.168       |
| pooling_digabel19       | 0.001    | 0.001    | 14953      | 18095      | 0.168  | 0.166   | 0.267        |
| pooling_foulds2stp      | 0.000    | 0.000    | 36         | 25         | 1.000  | 0.000   | 0.000        |
| pooling_foulds3stp      | 0.000    | 0.000    | 1084       | 416        | 1.000  | 0.000   | 0.000        |
| pooling_foulds4stp      | 0.000    | 0.000    | 717        | 339        | 1.000  | 0.000   | 0.000        |
| pooling_foulds5stp      | 0.019    | 0.000    | 1808       | 2741       | -1.000 | -0.999  | -0.999       |
| pooling_haverly2stp     | 0.000    | 0.000    | 10         | 12         | 1.000  | 0.000   | 0.000        |
| pooling_rt2pq           | 0.000    | 0.000    | 237        | 431        | 1.000  | 0.000   | 0.000        |
| pooling_rt2stp          | 0.000    | 0.000    | 109        | 195        | 1.000  | 0.000   | 0.000        |
| pooling_rt2tp           | 0.000    | 0.000    | 53         | 57         | 1.000  | 0.000   | 0.000        |
| pooling_sppa0pq         | 0.038    | 0.031    | 2424       | 3666       | -0.230 | -0.187  | 0.187        |
| pooling_sppa0stp        | 2.829    | 2.865    | 2577       | 3068       | 0.012  | 0.012   | 0.170        |
| pooling_sppa0tp         | 0.179    | 0.183    | 2804       | 3623       | 0.021  | 0.021   | 0.242        |
| pooling_sppa5pq         | 0.037    | 0.018    | 709        | 781        | -0.995 | -0.499  | -0.448       |
| pooling_sppa5stp        | 3.959    | 3.959    | 220        | 278        | 0.000  | 0.000   | 0.209        |
| pooling_sppa5tp         | 1.579    | 1.579    | 299        | 448        | 0.000  | 0.000   | 0.333        |
| pooling_sppa9pq         | 0.007    | 0.007    | 222        | 295        | 0.000  | 0.000   | 0.247        |
| pooling_sppb0pq         | 0.098    | 0.098    | 223        | 301        | 0.000  | -0.000  | 0.259        |
| popdynm100              | ∞        | ∞        | 7556       | 11105      | 0.000  | 0.000   | 0.320        |
| popdynm25               | ∞        | ∞        | 14627      | 19046      | 0.000  | 0.000   | 0.232        |
| popdynm50               | ∞        | ∞        | 12085      | 15252      | 0.000  | 0.000   | 0.208        |
| portfol_classical050_1  | 0.000    | 0.000    | 651        | 817        | 1.000  | 0.000   | 0.000        |
| portfol_classical200_2  | 0.141    | 0.125    | 396        | 491        | -0.134 | -0.118  | 0.086        |
| portfol_robust050_34    | 0.000    | 0.000    | 94         | 49         | 1.000  | 0.000   | 0.000        |
| portfol_robust100_09    | 0.000    | 0.000    | 489        | 361        | 1.000  | 0.000   | 0.000        |
| portfol_robust200_03    | 0.182    | 0.189    | 95         | 75         | 0.034  | 0.034   | -0.183       |
| portfol_shortfall050_68 | 0.000    | 0.000    | 467        | 375        | 1.000  | 0.000   | 0.000        |
| portfol_shortfall100_04 | 0.010    | 0.010    | 595        | 1398       | -0.055 | -0.052  | 0.551        |
| portfol_shortfall200_05 | 0.033    | 0.028    | 224        | 232        | -0.169 | -0.145  | -0.114       |
| powerflow0009r          | 0.000    | 0.000    | 15230      | 13141      | -1.000 | -0.037  | -0.003       |
| powerflow0014r          | 0.001    | 0.001    | 8052       | 8041       | 0.368  | 0.366   | 0.346        |
| powerflow0030r          | 0.023    | 0.034    | 369        | 403        | 0.328  | 0.328   | 0.384        |
| powerflow0039r          | 0.017    | 0.016    | 212        | 224        | -0.058 | -0.054  | -0.001       |
| product                 | 0.028    | 0.034    | 236        | 650        | 0.197  | 0.197   | 0.708        |
| qap                     | 198.418  | ∞        | 709        | 3352       | 1.000  | 1.000   | 1.000        |
| qapw                    | 351.271  | ∞        | 874        | 2437       | 1.000  | 1.000   | 1.000        |
| qp3                     | ∞        | ∞        | 29875      | 32155      | 0.000  | 0.000   | 0.071        |
| qspp_0_10_0_1_10_1      | 0.849    | 1.238    | 3860       | 3982       | 0.314  | 0.314   | 0.335        |
| qspp_0_11_0_1_10_1      | 1.071    | 1.886    | 1314       | 3036       | 0.432  | 0.432   | 0.754        |
| qspp_0_12_0_1_10_1      | 1.674    | 2.102    | 794        | 1847       | 0.204  | 0.203   | 0.658        |
| qspp_0_13_0_1_10_1      | 1.893    | 4.660    | 935        | 1380       | 0.594  | 0.594   | 0.725        |
| qspp_0_14_0_1_10_1      | 3.038    | 3.200    | 299        | 1081       | 0.050  | 0.050   | 0.737        |
| qspp_0_15_0_1_10_1      | 4.356    | 4.293    | 229        | 544        | -0.015 | -0.015  | 0.573        |

Continued on next page

| Name                  | Gap Ours | Gap Base | Nodes Ours | Nodes Base | Reward | Utility | Utility/Node |
|-----------------------|----------|----------|------------|------------|--------|---------|--------------|
| ringpack_10_1         | 0.082    | 1.000    | 5346       | 6348       | 0.918  | 0.918   | 0.931        |
| ringpack_10_2         | 0.082    | 0.811    | 5402       | 6366       | 0.899  | 0.899   | 0.914        |
| ringpack_20_1         | 1.551    | 3.527    | 525        | 492        | 0.560  | 0.560   | 0.531        |
| ringpack_20_2         | 9.000    | 9.000    | 239        | 183        | 0.000  | 0.000   | -0.234       |
| ringpack_20_3         | 6.251    | 6.251    | 272        | 243        | 0.000  | 0.000   | -0.107       |
| ringpack_30_2         | 14.000   | 14.000   | 36         | 49         | 0.000  | 0.000   | 0.265        |
| sep1                  | 0.000    | 0.000    | 39         | 29         | 1.000  | 0.000   | 0.000        |
| slay04h               | 0.000    | 0.000    | 8          | 8          | 1.000  | 0.000   | 0.000        |
| slay04m               | 0.000    | 0.000    | 7          | 7          | 1.000  | 0.000   | 0.000        |
| slay05h               | 0.000    | 0.000    | 64         | 119        | 1.000  | 0.000   | 0.000        |
| slay06h               | 0.000    | 0.000    | 120        | 208        | 1.000  | 0.000   | 0.000        |
| slay06m               | 0.000    | 0.000    | 8          | 8          | 1.000  | 0.000   | 0.000        |
| slay07h               | 0.000    | 0.000    | 420        | 952        | 1.000  | 0.000   | 0.000        |
| slay07m               | 0.000    | 0.000    | 218        | 501        | 1.000  | 0.000   | 0.000        |
| slay08h               | 0.000    | 0.000    | 513        | 1181       | 1.000  | 0.000   | 0.000        |
| slay08m               | 0.000    | 0.000    | 193        | 554        | 1.000  | 0.000   | 0.000        |
| slay09h               | 0.104    | 0.135    | 612        | 488        | 0.229  | 0.229   | 0.033        |
| slay09m               | 0.000    | 0.000    | 324        | 212        | 1.000  | 0.000   | 0.000        |
| slay10h               | 0.103    | 0.407    | 703        | 451        | 0.746  | 0.745   | 0.603        |
| slay10m               | 0.000    | 0.000    | 3933       | 4138       | 1.000  | 0.000   | 0.000        |
| smallinvDAXr1b010-011 | 0.000    | 0.000    | 324        | 264        | 1.000  | 0.000   | 0.000        |
| smallinvDAXr1b020-022 | 0.000    | 0.000    | 657        | 906        | 1.000  | 0.000   | 0.000        |
| smallinvDAXr1b050-055 | 0.000    | 0.000    | 6083       | 4430       | 1.000  | 0.000   | 0.000        |
| smallinvDAXr1b100-110 | 0.000    | 0.000    | 15366      | 34917      | 1.000  | 0.000   | 0.000        |
| smallinvDAXr1b150-165 | 0.000    | 0.001    | 26952      | 40900      | 1.000  | 0.986   | 0.730        |
| smallinvDAXr1b200-220 | 0.000    | 0.001    | 38238      | 46021      | 0.348  | 0.342   | 0.269        |
| smallinvDAXr2b010-011 | 0.000    | 0.000    | 254        | 358        | 1.000  | 0.000   | 0.000        |
| smallinvDAXr2b020-022 | 0.000    | 0.000    | 1204       | 2016       | 1.000  | 0.000   | 0.000        |
| smallinvDAXr2b050-055 | 0.000    | 0.000    | 7868       | 6682       | 1.000  | 0.000   | 0.000        |
| smallinvDAXr2b100-110 | 0.000    | 0.000    | 12971      | 14333      | 1.000  | 0.000   | 0.000        |
| smallinvDAXr2b150-165 | 0.000    | 0.000    | 39670      | 68543      | 1.000  | 0.966   | 0.421        |
| smallinvDAXr2b200-220 | 0.000    | 0.000    | 712        | 651        | 1.000  | 0.000   | 0.000        |
| smallinvDAXr3b010-011 | 0.000    | 0.000    | 260        | 358        | 1.000  | 0.000   | 0.000        |
| smallinvDAXr3b020-022 | 0.000    | 0.000    | 1676       | 906        | 1.000  | 0.000   | 0.000        |
| smallinvDAXr3b050-055 | 0.000    | 0.000    | 5716       | 5024       | 1.000  | 0.000   | 0.000        |
| smallinvDAXr3b100-110 | 0.000    | 0.000    | 39948      | 13726      | 1.000  | 0.000   | 0.000        |
| smallinvDAXr3b150-165 | 0.000    | 0.000    | 34109      | 22132      | 1.000  | 0.000   | 0.000        |
| smallinvDAXr3b200-220 | 0.000    | 0.000    | 1078       | 433        | 1.000  | 0.000   | 0.000        |
| smallinvDAXr4b010-011 | 0.000    | 0.000    | 272        | 292        | 1.000  | 0.000   | 0.000        |
| smallinvDAXr4b020-022 | 0.000    | 0.000    | 1078       | 990        | 1.000  | 0.000   | 0.000        |
| smallinvDAXr4b050-055 | 0.000    | 0.000    | 3098       | 2666       | 1.000  | 0.000   | 0.000        |
| smallinvDAXr4b100-110 | 0.000    | 0.000    | 17899      | 26316      | 1.000  | 0.000   | 0.000        |
| smallinvDAXr4b150-165 | 0.000    | 0.000    | 32042      | 56419      | 1.000  | 0.000   | 0.000        |
| smallinvDAXr4b200-220 | 0.000    | 0.000    | 935        | 612        | 1.000  | 0.000   | 0.000        |
| smallinvDAXr5b010-011 | 0.000    | 0.000    | 242        | 381        | 1.000  | 0.000   | 0.000        |
| smallinvDAXr5b020-022 | 0.000    | 0.000    | 1798       | 884        | 1.000  | 0.000   | 0.000        |
| smallinvDAXr5b050-055 | 0.000    | 0.000    | 4276       | 3312       | 1.000  | 0.000   | 0.000        |
| smallinvDAXr5b100-110 | 0.000    | 0.000    | 37028      | 72501      | 1.000  | 0.980   | 0.570        |
| smallinvDAXr5b150-165 | 0.000    | 0.000    | 40757      | 78031      | 1.000  | 0.966   | 0.414        |
| smallinvDAXr5b200-220 | 0.000    | 0.000    | 783        | 585        | 1.000  | 0.000   | 0.000        |
| sonet22v5             | 3.752    | 2.911    | 105        | 356        | -0.289 | -0.224  | 0.620        |
| sonet23v4             | 1.407    | 1.366    | 79         | 181        | -0.030 | -0.029  | 0.550        |
| sonet24v5             | 4.070    | 3.914    | 21         | 212        | -0.040 | -0.038  | 0.897        |
| sonet25v6             | 5.161    | 4.812    | 10         | 45         | -0.072 | -0.068  | 0.762        |
| sonetgr17             | 2.252    | 2.602    | 400        | 1247       | 0.134  | 0.134   | 0.722        |
| space25               | $\infty$ | $\infty$ | 154        | 143        | 0.000  | 0.000   | -0.071       |
| spectra2              | 0.000    | 0.000    | 8          | 8          | 1.000  | 0.000   | 0.000        |
| squff010-025          | 0.000    | 0.000    | 71985      | 75945      | 0.692  | 0.000   | 0.000        |
| squff010-040          | 0.000    | 0.000    | 18478      | 20101      | 0.529  | 0.000   | 0.000        |
| squff010-080          | 0.000    | 0.000    | 4509       | 8339       | 0.568  | -0.000  | 0.000        |
| squff010-080persp     | 0.000    | 0.000    | 6          | 6          | 1.000  | 0.000   | 0.000        |
| squff015-060          | 0.000    | 0.000    | 7372       | 10223      | 0.608  | -0.000  | 0.000        |
| squff015-060persp     | 0.000    | 0.000    | 6          | 6          | 1.000  | 0.000   | 0.000        |
| squff015-080          | 0.000    | 0.001    | 3475       | 6667       | 1.000  | 0.993   | 0.976        |
| squff020-040          | 0.000    | 0.000    | 8358       | 10679      | 0.570  | 0.000   | 0.000        |
| squff020-050          | 0.000    | 0.000    | 4094       | 8025       | 0.365  | -0.000  | 0.000        |
| squff020-150          | 0.014    | 0.014    | 9          | 7          | 0.000  | 0.000   | -0.222       |
| squff020-150persp     | 0.000    | 0.000    | 16         | 16         | 1.000  | 0.000   | 0.000        |
| squff025-025          | 0.000    | 0.000    | 15093      | 11992      | 0.997  | -0.000  | -0.000       |
| squff025-025persp     | 0.000    | 0.000    | 12         | 12         | 1.000  | 0.000   | 0.000        |
| squff025-030          | 0.000    | 0.000    | 5523       | 14798      | 1.000  | 0.000   | 0.000        |
| squff025-030persp     | 0.000    | 0.000    | 6          | 6          | 1.000  | 0.000   | 0.000        |
| squff025-040          | 0.000    | 0.000    | 6438       | 7860       | 0.519  | 0.000   | 0.000        |
| squff025-040persp     | 0.000    | 0.000    | 12         | 12         | 1.000  | 0.000   | 0.000        |
| squff030-100          | 0.000    | 0.000    | 1291       | 1402       | 0.289  | 0.000   | 0.000        |
| squff040-080          | 0.000    | 0.001    | 1034       | 1477       | 1.000  | 0.983   | 0.983        |
| squff040-080persp     | 0.000    | 0.000    | 8          | 8          | 1.000  | 0.000   | 0.000        |

Continued on next page

| Name                    | Gap Ours | Gap Base | Nodes Ours | Nodes Base | Reward | Utility | Utility/Node |
|-------------------------|----------|----------|------------|------------|--------|---------|--------------|
| sssd08-04persp          | 0.000    | 0.000    | 20080      | 17359      | 1.000  | 0.000   | 0.000        |
| sssd12-05persp          | 0.131    | 0.133    | 63030      | 73358      | 0.016  | 0.016   | 0.154        |
| sssd15-04persp          | 0.188    | 0.181    | 76121      | 77773      | -0.041 | -0.039  | -0.018       |
| sssd15-06persp          | 0.285    | 0.260    | 43387      | 47623      | -0.095 | -0.087  | 0.002        |
| sssd15-08persp          | 0.235    | 0.234    | 30374      | 41340      | -0.005 | -0.005  | 0.261        |
| sssd16-07persp          | 0.232    | 0.214    | 41858      | 46101      | -0.086 | -0.079  | 0.014        |
| sssd18-06persp          | 0.200    | 0.188    | 40346      | 48551      | -0.063 | -0.059  | 0.117        |
| sssd18-08persp          | 0.383    | 0.372    | 31676      | 41841      | -0.028 | -0.027  | 0.221        |
| sssd20-04persp          | 0.202    | 0.202    | 63012      | 69887      | 0.002  | 0.002   | 0.100        |
| sssd20-08persp          | 0.202    | 0.195    | 27951      | 34670      | -0.036 | -0.035  | 0.164        |
| sssd22-08persp          | 0.228    | 0.212    | 31593      | 33795      | -0.077 | -0.071  | -0.007       |
| sssd25-08persp          | 0.178    | 0.172    | 27400      | 33837      | -0.038 | -0.037  | 0.159        |
| st_bs2                  | 0.000    | 0.000    | 17         | 15         | 1.000  | 0.000   | 0.000        |
| st_e05                  | 0.000    | 0.000    | 59         | 75         | 1.000  | 0.000   | 0.000        |
| st_e24                  | 0.000    | 0.000    | 7          | 7          | 1.000  | 0.000   | 0.000        |
| st_e25                  | 0.000    | 0.000    | 15         | 15         | 1.000  | 0.000   | 0.000        |
| st_e30                  | 0.000    | 0.000    | 47         | 61         | 1.000  | 0.000   | 0.000        |
| st_e31                  | 0.000    | 0.000    | 593        | 490        | 1.000  | 0.000   | 0.000        |
| st_fp7a                 | 0.000    | 0.000    | 297        | 345        | 1.000  | 0.000   | 0.000        |
| st_fp7b                 | 0.000    | 0.000    | 349        | 341        | 1.000  | 0.000   | 0.000        |
| st_fp7c                 | 0.000    | 0.000    | 253        | 449        | 1.000  | 0.000   | 0.000        |
| st_fp7d                 | 0.000    | 0.000    | 277        | 355        | 1.000  | 0.000   | 0.000        |
| st_fp7e                 | 0.000    | 0.000    | 1605       | 1831       | 1.000  | 0.000   | 0.000        |
| st_fp8                  | 0.000    | 0.000    | 69         | 63         | 1.000  | 0.000   | 0.000        |
| st_gimp_ss1             | 0.000    | 0.000    | 23         | 25         | 1.000  | 0.000   | 0.000        |
| st_ht                   | 0.000    | 0.000    | 13         | 11         | 1.000  | 0.000   | 0.000        |
| st_iqpbk1               | 0.000    | 0.000    | 37         | 37         | 1.000  | 0.000   | 0.000        |
| st_iqpbk2               | 0.000    | 0.000    | 39         | 37         | 1.000  | 0.000   | 0.000        |
| st_jcbpaf2              | 0.000    | 0.000    | 9          | 13         | 1.000  | 0.000   | 0.000        |
| st_m1                   | 0.000    | 0.000    | 783        | 383        | 1.000  | 0.000   | 0.000        |
| st_m2                   | 0.000    | 0.000    | 637        | 619        | 1.000  | 0.000   | 0.000        |
| st_pan1                 | 0.000    | 0.000    | 11         | 11         | 1.000  | 0.000   | 0.000        |
| st_ph11                 | 0.000    | 0.000    | 11         | 11         | 1.000  | 0.000   | 0.000        |
| st_ph12                 | 0.000    | 0.000    | 13         | 13         | 1.000  | 0.000   | 0.000        |
| st_ph13                 | 0.000    | 0.000    | 9          | 9          | 1.000  | 0.000   | 0.000        |
| st_qpc-m1               | 0.000    | 0.000    | 15         | 17         | 1.000  | 0.000   | 0.000        |
| st_qpc-m3a              | 0.000    | 0.000    | 1269       | 1291       | 1.000  | 0.000   | 0.000        |
| st_qpk1                 | 0.000    | 0.000    | 7          | 7          | 1.000  | 0.000   | 0.000        |
| st_qpk2                 | 0.000    | 0.000    | 27         | 27         | 1.000  | 0.000   | 0.000        |
| st_qpk3                 | 0.000    | 0.000    | 137        | 133        | 1.000  | 0.000   | 0.000        |
| st_rv1                  | 0.000    | 0.000    | 107        | 81         | 1.000  | 0.000   | 0.000        |
| st_rv2                  | 0.000    | 0.000    | 133        | 119        | 1.000  | 0.000   | 0.000        |
| st_rv3                  | 0.000    | 0.000    | 511        | 629        | 1.000  | 0.000   | 0.000        |
| st_rv7                  | 0.000    | 0.000    | 1143       | 1153       | 1.000  | 0.000   | 0.000        |
| st_rv8                  | 0.000    | 0.000    | 1047       | 1269       | 1.000  | 0.000   | 0.000        |
| st_rv9                  | 0.000    | 0.000    | 3349       | 1875       | 1.000  | 0.000   | 0.000        |
| st_testgr1              | 0.000    | 0.000    | 38         | 21         | 1.000  | 0.000   | 0.000        |
| st_z                    | 0.000    | 0.000    | 9          | 9          | 1.000  | 0.000   | 0.000        |
| supplychain             | 0.000    | 0.000    | 119        | 95         | 1.000  | 0.000   | 0.000        |
| tln12                   | 0.295    | 0.217    | 20517      | 22942      | -0.362 | -0.266  | -0.179       |
| tln4                    | 0.000    | 0.000    | 13         | 25         | 1.000  | 0.000   | 0.000        |
| tln6                    | 0.000    | 0.000    | 40         | 38         | 1.000  | 0.000   | 0.000        |
| tln7                    | 0.075    | 0.121    | 52425      | 60523      | 0.375  | 0.375   | 0.457        |
| toroidal3g7.6666        | 0.200    | 0.117    | 51         | 213        | -0.706 | -0.414  | 0.592        |
| trisp                   | $\infty$ | $\infty$ | 275        | 356        | 0.000  | 0.000   | 0.228        |
| util                    | 0.000    | 0.000    | 48         | 38         | 1.000  | 0.000   | 0.000        |
| wastewater02m1          | 0.000    | 0.000    | 43         | 43         | 1.000  | 0.000   | 0.000        |
| wastewater02m2          | 0.000    | 0.000    | 35         | 31         | 1.000  | 0.000   | 0.000        |
| wastewater04m1          | 0.000    | 0.000    | 117        | 81         | 1.000  | 0.000   | 0.000        |
| wastewater04m2          | 0.000    | 0.000    | 25         | 25         | 1.000  | 0.000   | 0.000        |
| wastewater05m1          | 0.000    | 0.000    | 2561       | 3047       | 1.000  | 0.000   | 0.000        |
| wastewater05m2          | 0.000    | 0.000    | 4068       | 7429       | 1.000  | 0.000   | 0.000        |
| wastewater11m1          | 0.116    | 0.131    | 40219      | 43385      | 0.113  | 0.113   | 0.177        |
| wastewater11m2          | 0.385    | 0.431    | 15161      | 15304      | 0.106  | 0.106   | 0.114        |
| wastewater12m1          | 0.099    | 0.045    | 23070      | 28082      | -1.000 | -0.541  | -0.440       |
| wastewater12m2          | 0.460    | 0.654    | 7232       | 7822       | 0.296  | 0.296   | 0.349        |
| wastewater13m1          | 0.446    | 0.370    | 12150      | 16381      | -0.207 | -0.171  | 0.105        |
| wastewater13m2          | 0.538    | 0.538    | 6204       | 6129       | 0.000  | 0.000   | -0.012       |
| wastewater14m1          | 0.151    | 0.122    | 38064      | 42510      | -0.236 | -0.191  | -0.096       |
| wastewater14m2          | 0.191    | 0.209    | 11743      | 13355      | 0.084  | 0.084   | 0.194        |
| wastewater15m1          | 0.000    | 0.000    | 7735       | 8130       | 1.000  | 0.000   | 0.000        |
| wastewater15m2          | 0.000    | 0.000    | 54228      | 59163      | 0.982  | -0.000  | -0.000       |
| watercontamination0303  | 0.000    | 0.000    | 9          | 9          | 1.000  | 0.000   | 0.000        |
| watercontamination0303r | $\infty$ | $\infty$ | 22         | 37         | 0.000  | 0.000   | 0.405        |
| waterund01              | 0.000    | 0.000    | 49001      | 57176      | -0.022 | -0.021  | 0.056        |
| waterund08              | 0.000    | 0.000    | 38355      | 41489      | 0.335  | 0.083   | 0.003        |
| waterund11              | 0.001    | 0.001    | 35021      | 40695      | -0.736 | -0.420  | -0.241       |

Continued on next page

| Name       | Gap Ours | Gap Base | Nodes Ours | Nodes Base | Reward       | Utility | Utility/Node |
|------------|----------|----------|------------|------------|--------------|---------|--------------|
| waterund14 | 0.009    | 0.009    | 9789       | 10684      | -0.012       | -0.012  | 0.072        |
| waterund17 | 0.001    | 0.001    | 35708      | 36527      | 0.549        | 0.545   | 0.436        |
| waterund18 | 0.001    | 0.001    | 34080      | 36286      | 0.049        | 0.048   | 0.085        |
| waterund22 | 0.016    | 0.017    | 10195      | 10702      | 0.016        | 0.016   | 0.062        |
| waterund25 | 0.080    | 0.094    | 11100      | 10382      | 0.154        | 0.153   | 0.095        |
| waterund27 | 0.089    | 0.089    | 2253       | 2835       | 0.001        | 0.001   | 0.206        |
| waterund28 | 0.080    | 0.080    | 18         | 17         | 0.000        | 0.000   | -0.056       |
| waterund36 | 0.100    | 0.082    | 1841       | 2443       | -0.217       | -0.178  | 0.083        |
| Mean       | —        | —        | 6315       | 7463       | <b>0.487</b> | 0.000   | <b>0.114</b> |

### D.3.1 KOCHETOV-UFLP

To demonstrate the generalizability of the learned heuristics, we test our method on the Uncapacitated Facility Location Problem (see Appendix B) *without further finetuning*, i.e., we only train on TSP instances and never show the algorithm any other linear or nonlinear problem. For testing, we generate 1000 instances using the well-known problem generator by Kochetov & Ivanenko (2005), which was designed to have large optimality gaps, making these problems particularly challenging.

Our method performs very similar to the highly optimized baseline, despite never having seen the UFL problem, see Table 1. We argue that this is specifically because our method relies on tree-wide behaviour, rather than individual features to make decisions. We further hypothesize that the reason for the advantage over the baseline being so small is due to the fact that UFLP consists of “adversarial examples” to the branch-and-bound method where cuts have reduced effectiveness. This means clever node-selection strategies have limited impact on overall performance.

An interesting aspect is that our method processes more nodes than the baseline, which also leads to the loss in node-efficiency. This implies that our method selects significantly easier nodes, as ordinarily our solver is slower just due to the additional overhead. Considering that this benchmark was specifically designed to produce high optimality gaps, it makes sense that our solver favours node quantity over quality, which is an interesting emergent behaviour of our solver.

## E ARCHITECTURE

Our network consists of two subsystems: First, we have the feature embedder that transforms the raw features into embeddings, without considering other nodes this network consists of one linear layer  $|d_{features}| \rightarrow |d_{model}|$  with LeakyReLU Xu et al. (2015) activation followed by two  $|d_{model}| \rightarrow |d_{model}|$  linear layers (activated by LeakyReLU) with skip connections. We finally normalize the outputs using a Layernorm Ba et al. (2016) *without* trainable parameters (i.e., just shifting and scaling the feature dimension to a normal distribution).

Second, we consider the GNN model, whose objective is the aggregation across nodes according to the tree topology. This consists of a single LeakyReLU activated layer with skip-connections. We use ReZero Bachlechner et al. (2020) initialization to improve the convergence properties of the network. Both the weight and value heads are simple linear projections from the embedding space. Following the guidance in Andrychowicz et al. (2020), we make sure the value and weight networks are independent by detaching the value head’s gradient from the embedding network.
